# Supplementary material for: Metabolite and lipoprotein profiles reveal sex-related oxidative stress imbalance in de novo drug-naive Parkinson’s disease patients
Source: Springer Nature journal article supplement (doi:10.1038/s41531-021-00274-8), 2022-02-08

## Supplementary Information

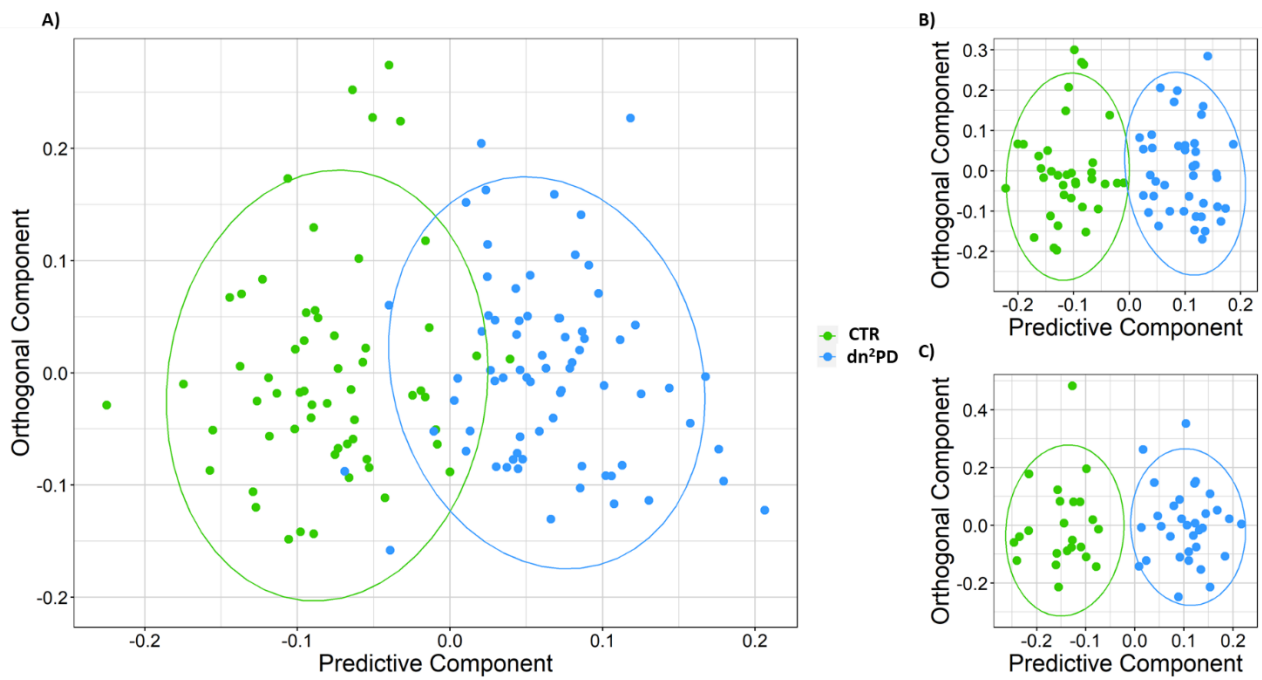

**Supplementary Figure 1.** OPLS-DA score plots of bucketed 1D-NOESY <sup>1</sup>H NMR serum spectra. **A)** OPLS-DA score plot of overall training cohort; **B)** OPLS-DA score plot of male training subjects; **C)** OPLS-DA score plot of female training subjects. Colours coded for individual status: CTR (green dots) and dn<sup>2</sup>PD patients (blue dots). Ellipses indicate the confidence interval ( $P$ -value < 0.05) for each group.

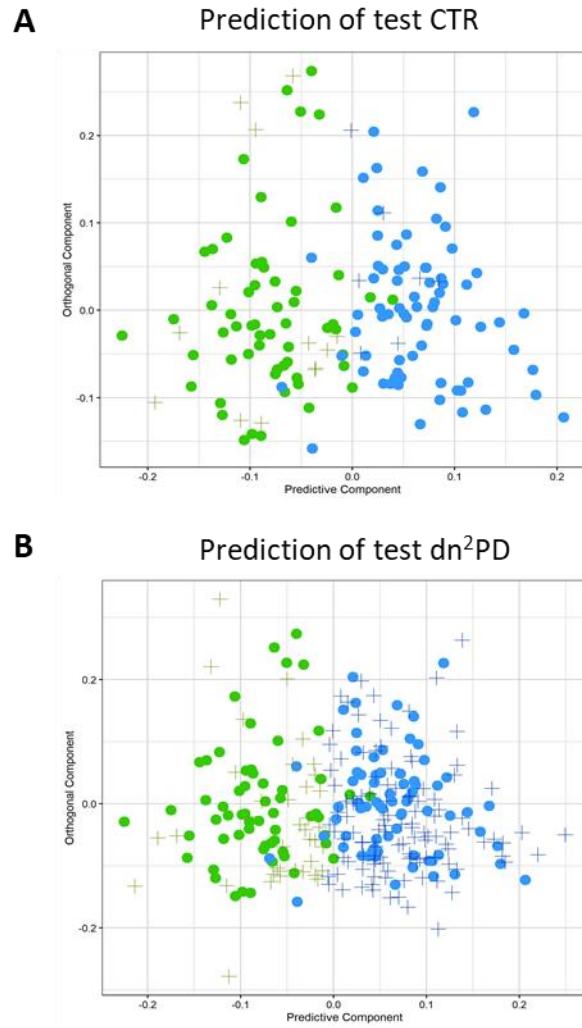

**Supplementary Figure 2.** OPLS-DA score plot of training model discriminating CTR (green dots) from  $dn^2PD$  patients (blue dots). “+” light green symbol: validation samples of true healthy controls; “+” dark blue symbol: validation samples of true  $dn^2PD$ .

**Supplementary Table 1.** Complete Log<sub>2</sub>(Fold-Change) ratios of univariate groups' comparison. Positive Log<sub>2</sub>FC values refer to higher metabolite/lipoprotein levels in dn<sup>2</sup>PD patients compared to CTR group of training samples. *P*-value, FDR and Effect size are also reported. Quantified metabolites and lipoproteins are coloured in green and orange respectively.

|                     | MALES                 |            |                    |                            | FEMALES         |            |                    |                            |
|---------------------|-----------------------|------------|--------------------|----------------------------|-----------------|------------|--------------------|----------------------------|
|                     | <i>p</i> -value       | <i>FDR</i> | <i>Effect size</i> | <i>Log<sub>2</sub>(FC)</i> | <i>p</i> -value | <i>FDR</i> | <i>Effect size</i> | <i>Log<sub>2</sub>(FC)</i> |
| Acetic-acid         | 3.76·10 <sup>1</sup>  | 0.6639     | negligible         | -0.1312                    | 0.3093          | 0.5981     | small              | -0.1829                    |
| Acetoacetic-acid    | 4.10·10 <sup>1</sup>  | 0.6917     | negligible         | 0.0704                     | 0.5959          | 0.8229     | negligible         | 0                          |
| Acetone             | 5.79·10 <sup>-6</sup> | 0.0008     | large              | 0.9092                     | 0.3977          | 0.6784     | negligible         | 0.4854                     |
| Alanine             | 5.22·10 <sup>1</sup>  | 0.7653     | negligible         | -0.0329                    | 0.0222          | 0.3221     | medium             | 0.182                      |
| Citric-acid         | 4.57·10 <sup>2</sup>  | 0.1466     | small              | 0.192                      | 0.9252          | 0.9252     | negligible         | -0.0273                    |
| Creatine            | 4.32·10 <sup>1</sup>  | 0.7015     | negligible         | -0.415                     | 0.8779          | 0.9092     | negligible         | 0.1278                     |
| Creatinine          | 7.35·10 <sup>1</sup>  | 0.8747     | negligible         | -0.0076                    | 0.5331          | 0.773      | negligible         | -0.0284                    |
| Dimethylsulfone     | 3.32·10 <sup>1</sup>  | 0.611      | negligible         | -0.0589                    | 0.2113          | 0.5699     | small              | -0.1926                    |
| Formic-acid         | 6.19·10 <sup>2</sup>  | 0.1885     | small              | 0.1325                     | 0.7581          | 0.8332     | negligible         | -0.0566                    |
| Glucose             | 5.60·10 <sup>1</sup>  | 0.7853     | negligible         | -0.0634                    | 0.7137          | 0.8294     | negligible         | -0.0144                    |
| Glutamine           | 2.44·10 <sup>1</sup>  | 0.4982     | small              | 0.024                      | 0.5057          | 0.7718     | negligible         | -0.0148                    |
| Glycine             | 1.37·10 <sup>2</sup>  | 0.0674     | small              | 0.13                       | 0.701           | 0.8294     | negligible         | -0.0024                    |
| Histidine           | 4.61·10 <sup>2</sup>  | 0.1466     | small              | 0.0982                     | 0.2287          | 0.5699     | small              | 0.0704                     |
| Isoleucine          | 9.34·10 <sup>1</sup>  | 0.9461     | negligible         | 0.0224                     | 0.2526          | 0.5699     | small              | 0                          |
| Lactic-acid         | 2.12·10 <sup>2</sup>  | 0.0892     | small              | 0.2499                     | 0.3554          | 0.6441     | small              | 0.2619                     |
| Leucine             | 7.08·10 <sup>1</sup>  | 0.8728     | negligible         | -0.0599                    | 0.1802          | 0.5699     | small              | 0.1288                     |
| Methionine          | 1.27·10 <sup>1</sup>  | 0.3289     | small              | 0.4066                     | 0.7001          | 0.8294     | negligible         | 0.3576                     |
| N,N dimethylglycine | 1.09·10 <sup>1</sup>  | 0.2929     | small              | 0                          | 0.2751          | 0.5699     | small              | 0.2224                     |
| Ornithine           | 3.17·10 <sup>4</sup>  | 0.0054     | large              | 1.1543                     | 0.0859          | 0.4635     | small              | 0.585                      |
| Phenylalanine       | 2.73·10 <sup>5</sup>  | 0.0019     | large              | 0.2338                     | 0.0959          | 0.4635     | small              | 0.1669                     |
| Pyruvic-acid        | 4.76·10 <sup>1</sup>  | 0.7399     | negligible         | -0.0975                    | 0.1803          | 0.5699     | small              | 0.1844                     |
| Sarcosine           | 9.08·10 <sup>1</sup>  | 0.9326     | negligible         | 0                          | 0.7758          | 0.8332     | negligible         | 0.1699                     |

|                       |                   |        |            |         |        |        |            |         |
|-----------------------|-------------------|--------|------------|---------|--------|--------|------------|---------|
| Succinic-acid         | $1.60 \cdot 10^1$ | 0.3818 | small      | 0.415   | 0.715  | 0.8294 | negligible | 0       |
| TrimethylamineNoxide  | $3.38 \cdot 10^1$ | 0.6116 | negligible | 0.3692  | 0.4369 | 0.7038 | negligible | -0.4639 |
| Tyrosine              | $7.00 \cdot 10^1$ | 0.8728 | negligible | 0.012   | 0.0142 | 0.3221 | medium     | 0.1813  |
| Valine                | $2.89 \cdot 10^1$ | 0.5502 | negligible | 0.0455  | 0.0832 | 0.4635 | small      | 0.1699  |
| 3-Hydroxybutyric-acid | $5.73 \cdot 10^2$ | 0.178  | small      | 0.6234  | 0.2633 | 0.5699 | small      | 0.6234  |
| ApoA1                 | $5.45 \cdot 10^1$ | 0.7811 | negligible | 0.0197  | 0.6295 | 0.9805 | negligible | 0.0031  |
| ApoA2                 | $5.24 \cdot 10^1$ | 0.7653 | negligible | 0.019   | 0.3524 | 0.9805 | small      | -0.1024 |
| ApoB100               | $7.49 \cdot 10^4$ | 0.0054 | medium     | -0.1879 | 0.6295 | 0.9805 | negligible | -0.0497 |
| Chol                  | $2.94 \cdot 10^3$ | 0.0175 | medium     | -0.1295 | 0.4426 | 0.9805 | negligible | -0.0829 |
| Tg                    | $4.41 \cdot 10^1$ | 0.7078 | negligible | -0.1073 | 0.5706 | 0.9805 | negligible | 0.2642  |
| ApoB100/ApoA1         | $7.33 \cdot 10^4$ | 0.0054 | medium     | -0.2808 | 0.8981 | 0.9805 | negligible | -0.0809 |
| LDLChol/HDLChol       | $4.46 \cdot 10^4$ | 0.0054 | medium     | -0.3539 | 0.798  | 0.9805 | negligible | -0.0119 |
| ApoA1-HDL             | $4.59 \cdot 10^1$ | 0.728  | negligible | 0.0447  | 0.7329 | 0.9805 | negligible | 0.0045  |
| ApoA1-HDL1            | $3.94 \cdot 10^1$ | 0.6782 | negligible | 0.0519  | 0.7074 | 0.9805 | negligible | 0.0535  |
| ApoA1-HDL2            | $4.63 \cdot 10^1$ | 0.728  | negligible | 0.0645  | 0.4128 | 0.9805 | negligible | -0.0195 |
| ApoA1-HDL3            | $1.95 \cdot 10^1$ | 0.4503 | small      | 0.1467  | 0.6908 | 0.9805 | negligible | -0.0461 |
| ApoA1-HDL4            | $4.91 \cdot 10^1$ | 0.7439 | negligible | -0.0434 | 0.798  | 0.9805 | negligible | -0.0115 |
| ApoA2-HDL             | $5.99 \cdot 10^1$ | 0.8321 | negligible | 0.0073  | 0.2824 | 0.9805 | small      | -0.0867 |
| ApoA2-HDL1            | $7.43 \cdot 10^1$ | 0.8747 | negligible | -0.0697 | 0.3841 | 0.9805 | negligible | 0.0664  |
| ApoA2-HDL2            | $9.09 \cdot 10^1$ | 0.9326 | negligible | -0.0021 | 0.2323 | 0.9805 | small      | -0.1723 |
| ApoA2-HDL3            | $7.43 \cdot 10^1$ | 0.8747 | negligible | 0.0051  | 0.2862 | 0.9805 | small      | -0.1025 |
| ApoA2-HDL4            | $6.55 \cdot 10^1$ | 0.8588 | negligible | -0.0019 | 0.5278 | 0.9805 | negligible | -0.0857 |
| Chol-HDL              | $4.29 \cdot 10^1$ | 0.7015 | negligible | 0.0315  | 0.8857 | 0.9805 | negligible | 0.0377  |
| Chol-HDL1             | $8.76 \cdot 10^1$ | 0.9279 | negligible | -0.0534 | 0.8062 | 0.9805 | negligible | 0.0024  |
| Chol-HDL2             | $2.26 \cdot 10^1$ | 0.4715 | small      | 0.1463  | 0.9117 | 0.9805 | negligible | -0.081  |
| Chol-HDL3             | $1.29 \cdot 10^1$ | 0.3289 | small      | 0.1679  | 0.7671 | 0.9805 | negligible | 0.0387  |
| Chol-HDL4             | $8.19 \cdot 10^1$ | 0.9078 | negligible | -0.0198 | 0.4949 | 0.9805 | negligible | -0.0482 |
| FreeChol-HDL          | $7.91 \cdot 10^1$ | 0.8904 | negligible | -0.0406 | 0.899  | 0.9805 | negligible | -0.0626 |
| FreeChol-HDL1         | $7.79 \cdot 10^1$ | 0.8839 | negligible | -0.1228 | 0.8244 | 0.9805 | negligible | -0.1274 |

|               |                   |        |            |         |        |        |            |         |
|---------------|-------------------|--------|------------|---------|--------|--------|------------|---------|
| FreeChol-HDL2 | $2.27 \cdot 10^1$ | 0.4715 | small      | 0.1155  | 0.7265 | 0.9805 | negligible | -0.2852 |
| FreeChol-HDL3 | $8.27 \cdot 10^1$ | 0.9098 | negligible | 0.0316  | 0.3842 | 0.9805 | negligible | -0.1567 |
| FreeChol-HDL4 | $9.42 \cdot 10^1$ | 0.9461 | negligible | -0.0979 | 0.2785 | 0.9805 | small      | -0.0639 |
| Pho-HDL       | $2.14 \cdot 10^1$ | 0.4632 | small      | 0.1126  | 0.7414 | 0.9805 | negligible | -0.0317 |
| Pho-HDL1      | $6.74 \cdot 10^1$ | 0.8677 | negligible | 0.0187  | 0.7542 | 0.9805 | negligible | 0.138   |
| Pho-HDL2      | $1.60 \cdot 10^1$ | 0.3818 | small      | 0.1447  | 0.8062 | 0.9805 | negligible | 0.015   |
| Pho-HDL3      | $1.27 \cdot 10^1$ | 0.3289 | small      | 0.1285  | 0.4683 | 0.9805 | negligible | -0.0846 |
| Pho-HDL4      | $9.46 \cdot 10^1$ | 0.9461 | negligible | -0.0102 | 0.4014 | 0.9805 | negligible | -0.0771 |
| Tg-HDL        | $6.14 \cdot 10^1$ | 0.8441 | negligible | 0.0316  | 0.9663 | 0.9933 | negligible | 0.0555  |
| Tg-HDL1       | $2.61 \cdot 10^1$ | 0.5188 | small      | 0.309   | 0.9049 | 0.9805 | negligible | -0.1337 |
| Tg-HDL2       | $5.09 \cdot 10^1$ | 0.7579 | negligible | 0.0652  | 0.932  | 0.993  | negligible | 0.1736  |
| Tg-HDL3       | $8.15 \cdot 10^1$ | 0.9078 | negligible | 0.0161  | 0.6389 | 0.9805 | negligible | -0.1746 |
| Tg-HDL4       | $4.92 \cdot 10^1$ | 0.7439 | negligible | -0.0037 | 0.8112 | 0.9805 | negligible | 0.0083  |
| LDL           | $1.60 \cdot 10^4$ | 0.0033 | large      | -0.2816 | 0.4014 | 0.9805 | negligible | -0.0526 |
| LDL1          | $2.65 \cdot 10^1$ | 0.5193 | small      | 0.0264  | 0.5143 | 0.9805 | negligible | -0.1119 |
| LDL2          | $8.51 \cdot 10^2$ | 0.2367 | small      | -0.2226 | 0.5706 | 0.9805 | negligible | -0.204  |
| LDL3          | $1.95 \cdot 10^2$ | 0.0892 | small      | -0.2771 | 0.6537 | 0.9805 | negligible | -0.0447 |
| LDL4          | $6.63 \cdot 10^4$ | 0.0054 | medium     | -0.4911 | 0.9933 | 0.9933 | negligible | 0.0046  |
| LDL5          | $6.91 \cdot 10^4$ | 0.0054 | medium     | -0.3697 | 0.899  | 0.9805 | negligible | -0.0437 |
| LDL6          | $2.37 \cdot 10^2$ | 0.0892 | small      | -0.1844 | 0.7801 | 0.9805 | negligible | -0.025  |
| ApoB-LDL      | $1.60 \cdot 10^4$ | 0.0033 | large      | -0.2816 | 0.4014 | 0.9805 | negligible | -0.0526 |
| ApoB-LDL1     | $2.61 \cdot 10^1$ | 0.5188 | small      | 0.0261  | 0.5143 | 0.9805 | negligible | -0.1123 |
| ApoB-LDL2     | $8.61 \cdot 10^2$ | 0.2367 | small      | -0.2227 | 0.5706 | 0.9805 | negligible | -0.2038 |
| ApoB-LDL3     | $2.01 \cdot 10^2$ | 0.0892 | small      | -0.2769 | 0.6537 | 0.9805 | negligible | -0.0445 |
| ApoB-LDL4     | $6.63 \cdot 10^4$ | 0.0054 | medium     | -0.4907 | 0.9864 | 0.9933 | negligible | 0.0047  |
| ApoB-LDL5     | $6.91 \cdot 10^4$ | 0.0054 | medium     | -0.3696 | 0.8914 | 0.9805 | negligible | -0.0435 |
| ApoB-LDL6     | $2.37 \cdot 10^2$ | 0.0892 | small      | -0.1845 | 0.7801 | 0.9805 | negligible | -0.0254 |
| Chol-LDL      | $1.22 \cdot 10^4$ | 0.0033 | large      | -0.2585 | 0.5447 | 0.9805 | negligible | -0.0792 |
| Chol-LDL1     | $6.41 \cdot 10^2$ | 0.1908 | small      | -0.203  | 0.5034 | 0.9805 | negligible | -0.0567 |

|               |                   |        |            |         |        |        |            |         |
|---------------|-------------------|--------|------------|---------|--------|--------|------------|---------|
| Chol-LDL2     | $1.59 \cdot 10^4$ | 0.3818 | small      | -0.2222 | 0.5938 | 0.9805 | negligible | -0.1301 |
| Chol-LDL3     | $3.65 \cdot 10^2$ | 0.1274 | small      | -0.2337 | 0.666  | 0.9805 | negligible | -0.054  |
| Chol-LDL4     | $7.20 \cdot 10^4$ | 0.0054 | medium     | -0.4684 | 0.8511 | 0.9805 | negligible | 0.1122  |
| Chol-LDL5     | $6.57 \cdot 10^4$ | 0.0054 | medium     | -0.356  | 0.9933 | 0.9933 | negligible | -0.0161 |
| Chol-LDL6     | $2.24 \cdot 10^2$ | 0.0892 | small      | -0.1809 | 0.966  | 0.9933 | negligible | 0.0751  |
| FreeChol-LDL  | $3.54 \cdot 10^4$ | 0.0054 | medium     | -0.2955 | 0.5938 | 0.9805 | negligible | -0.0877 |
| FreeChol-LDL1 | $1.40 \cdot 10^1$ | 0.3502 | small      | -0.0601 | 0.2098 | 0.9805 | small      | -0.2078 |
| FreeChol-LDL2 | $6.32 \cdot 10^1$ | 0.845  | negligible | 0.0308  | 0.4176 | 0.9805 | negligible | -0.1883 |
| FreeChol-LDL3 | $2.04 \cdot 10^1$ | 0.4632 | small      | -0.1153 | 0.701  | 0.9805 | negligible | -0.1668 |
| FreeChol-LDL4 | $3.13 \cdot 10^3$ | 0.0179 | medium     | -0.3157 | 0.9728 | 0.9933 | negligible | -0.0544 |
| FreeChol-LDL5 | $1.28 \cdot 10^3$ | 0.008  | medium     | -0.3072 | 0.7717 | 0.9805 | negligible | -0.0463 |
| FreeChol-LDL6 | $3.94 \cdot 10^2$ | 0.1311 | small      | -0.1485 | 0.7718 | 0.9805 | negligible | 0.0207  |
| Pho-LDL       | $1.11 \cdot 10^4$ | 0.0033 | large      | -0.2493 | 0.4477 | 0.9805 | negligible | -0.0766 |
| Pho-LDL1      | $2.12 \cdot 10^1$ | 0.4632 | small      | -0.0547 | 0.4407 | 0.9805 | negligible | -0.1133 |
| Pho-LDL2      | $2.10 \cdot 10^1$ | 0.4632 | small      | -0.1665 | 0.5477 | 0.9805 | negligible | -0.1395 |
| Pho-LDL3      | $3.34 \cdot 10^2$ | 0.1209 | small      | -0.2053 | 0.5909 | 0.9805 | negligible | -0.0673 |
| Pho-LDL4      | $1.21 \cdot 10^3$ | 0.0079 | medium     | -0.4287 | 0.8578 | 0.9805 | negligible | 0.0742  |
| Pho-LDL5      | $5.42 \cdot 10^4$ | 0.0054 | medium     | -0.3376 | 0.9796 | 0.9933 | negligible | -0.0449 |
| Pho-LDL6      | $3.38 \cdot 10^2$ | 0.1209 | small      | -0.148  | 0.8311 | 0.9805 | negligible | 0.0221  |
| Tg-LDL        | $5.84 \cdot 10^3$ | 0.0298 | medium     | -0.2006 | 0.1804 | 0.9805 | small      | -0.0796 |
| Tg-LDL1       | $7.24 \cdot 10^1$ | 0.8747 | negligible | -0.1901 | 0.2824 | 0.9805 | small      | -0.0337 |
| Tg-LDL2       | $1.78 \cdot 10^1$ | 0.4169 | small      | -0.0723 | 0.314  | 0.9805 | small      | -0.0796 |
| Tg-LDL3       | $1.17 \cdot 10^3$ | 0.0079 | medium     | -0.337  | 0.4683 | 0.9805 | negligible | -0.018  |
| Tg-LDL4       | $4.51 \cdot 10^3$ | 0.0248 | medium     | -0.3554 | 0.3613 | 0.9805 | negligible | -0.1209 |
| Tg-LDL5       | $4.81 \cdot 10^3$ | 0.0255 | medium     | -0.3827 | 0.3524 | 0.9805 | small      | -0.0844 |
| Tg-LDL6       | $7.70 \cdot 10^2$ | 0.2201 | small      | -0.1525 | 0.7783 | 0.9805 | negligible | -0.0953 |
| IDL           | $2.09 \cdot 10^2$ | 0.0892 | small      | -0.203  | 0.5734 | 0.9805 | negligible | -0.1757 |
| ApoB-IDL      | $2.09 \cdot 10^2$ | 0.0892 | small      | -0.2026 | 0.5733 | 0.9805 | negligible | -0.1751 |
| Chol-IDL      | $2.30 \cdot 10^2$ | 0.0892 | small      | -0.3398 | 0.8914 | 0.9805 | negligible | -0.0026 |

|                |                   |        |            |         |        |        |            |        |
|----------------|-------------------|--------|------------|---------|--------|--------|------------|--------|
| FreeChol-IDL   | $3.89 \cdot 10^2$ | 0.1311 | small      | -0.3172 | 0.8645 | 0.9805 | negligible | 0.0234 |
| Pho-IDL        | $7.70 \cdot 10^2$ | 0.2201 | small      | -0.2223 | 0.6207 | 0.9805 | negligible | 0.2168 |
| Tg-IDL         | $4.11 \cdot 10^1$ | 0.6917 | negligible | -0.2446 | 0.6573 | 0.9805 | negligible | 0.4129 |
| VLDL           | $8.51 \cdot 10^1$ | 0.9155 | negligible | 0.1036  | 0.482  | 0.9805 | negligible | 0.1889 |
| ApoB-VLDL      | $8.47 \cdot 10^1$ | 0.9155 | negligible | 0.1032  | 0.4736 | 0.9805 | negligible | 0.1889 |
| Chol-VLDL      | $6.85 \cdot 10^1$ | 0.8728 | negligible | 0.0786  | 0.3919 | 0.9805 | negligible | 0.4222 |
| Chol-VLDL1     | $3.33 \cdot 10^1$ | 0.611  | negligible | -0.167  | 0.3127 | 0.9805 | small      | 0.8156 |
| Chol-VLDL2     | $5.53 \cdot 10^1$ | 0.7832 | negligible | -0.0374 | 0.4895 | 0.9805 | negligible | 0.4758 |
| Chol-VLDL3     | $8.39 \cdot 10^1$ | 0.9155 | negligible | 0.1751  | 0.6389 | 0.9805 | negligible | 0.5032 |
| Chol-VLDL4     | $6.43 \cdot 10^1$ | 0.8519 | negligible | 0.1302  | 0.8325 | 0.9805 | negligible | 0.2311 |
| Chol-VLDL5     | $3.57 \cdot 10^1$ | 0.6385 | negligible | 0.1269  | 0.216  | 0.9805 | small      | 0.2701 |
| FreeChol-VLDL  | $7.55 \cdot 10^1$ | 0.8747 | negligible | 0.1019  | 0.3554 | 0.9805 | small      | 0.4975 |
| FreeChol-VLDL1 | $2.28 \cdot 10^1$ | 0.4715 | small      | -0.2898 | 0.4895 | 0.9805 | negligible | 0.6905 |
| FreeChol-VLDL2 | $7.47 \cdot 10^1$ | 0.8747 | negligible | -0.0663 | 0.4225 | 0.9805 | negligible | 0.3991 |
| FreeChol-VLDL3 | $9.09 \cdot 10^1$ | 0.9326 | negligible | 0.1877  | 0.4225 | 0.9805 | negligible | 0.7304 |
| FreeChol-VLDL4 | $7.67 \cdot 10^1$ | 0.8773 | negligible | 0.1473  | 0.4948 | 0.9805 | negligible | 0.3756 |
| FreeChol-VLDL5 | $7.08 \cdot 10^1$ | 0.8728 | negligible | 0.4245  | 0.3862 | 0.9805 | negligible | 0.0589 |
| Pho-VLDL       | $6.32 \cdot 10^1$ | 0.845  | negligible | 0.0493  | 0.4611 | 0.9805 | negligible | 0.6681 |
| Pho-VLDL1      | $3.13 \cdot 10^1$ | 0.5888 | negligible | -0.3037 | 0.556  | 0.9805 | negligible | 0.6083 |
| Pho-VLDL2      | $5.46 \cdot 10^1$ | 0.7811 | negligible | -0.0674 | 0.4631 | 0.9805 | negligible | 0.3496 |
| Pho-VLDL3      | $8.64 \cdot 10^1$ | 0.9217 | negligible | 0.1694  | 0.5618 | 0.9805 | negligible | 0.3899 |
| Pho-VLDL4      | $9.13 \cdot 10^1$ | 0.9326 | negligible | 0.2092  | 0.6056 | 0.9805 | negligible | 0.1179 |
| Pho-VLDL5      | $7.35 \cdot 10^1$ | 0.8747 | negligible | 0.1541  | 0.2256 | 0.9805 | small      | 0.2103 |
| Tg-VLDL        | $6.25 \cdot 10^1$ | 0.845  | negligible | -0.0334 | 0.4407 | 0.9805 | negligible | 0.7592 |
| Tg-VLDL1       | $3.93 \cdot 10^1$ | 0.6782 | negligible | -0.3019 | 0.4508 | 0.9805 | negligible | 0.6854 |
| Tg-VLDL2       | $7.08 \cdot 10^1$ | 0.8728 | negligible | 0.0204  | 0.2811 | 0.9805 | small      | 0.4298 |
| Tg-VLDL3       | $8.84 \cdot 10^1$ | 0.9297 | negligible | 0.2029  | 0.4426 | 0.9805 | negligible | 0.3832 |
| Tg-VLDL4       | $6.62 \cdot 10^1$ | 0.8608 | negligible | 0.1536  | 0.5821 | 0.9805 | negligible | 0.243  |
| Tg-VLDL5       | $2.82 \cdot 10^1$ | 0.5441 | negligible | 0.1664  | 0.3181 | 0.9805 | small      | 0.2834 |

**Supplementary Table 2. Performances of the OPLS-DA models built to discriminate dn<sup>2</sup>PD male patients (n=123) from CTR male subjects (n=44).** CV OPLS-DA model built on the matrix of metabolites and lipoproteins and the model built on the matrix of bucketed spectra, to discriminate cases from CTRs, are compared in the table. Sensitivity, specificity and accuracy, calculated according to the standard definition, are reported.

| <b>performances</b> | <b>Metabolites and lipoproteins</b> |       |       | <b>Bucketed spectra</b> |       |       |
|---------------------|-------------------------------------|-------|-------|-------------------------|-------|-------|
|                     | Mean %                              | Min % | Max % | Mean %                  | Min % | Max % |
| <b>Sensitivity</b>  | 77.2                                | 68.8  | 84.3  | 74.9                    | 59.1  | 86.4  |
| <b>Specificity</b>  | 61.4                                | 45.5  | 75.6  | 79.4                    | 70.4  | 88.6  |
| <b>Accuracy</b>     | 73.05                               | 65.6  | 79.62 | 77.2                    | 65.9  | 86.4  |



**Supplementary Figure 3.** Importance of variables ranked by VIP (Variable Importance in Projection score) calculated from the OPLS-DA model built on quantified metabolites and lipoproteins (performance reported in Supplementary Table 2).

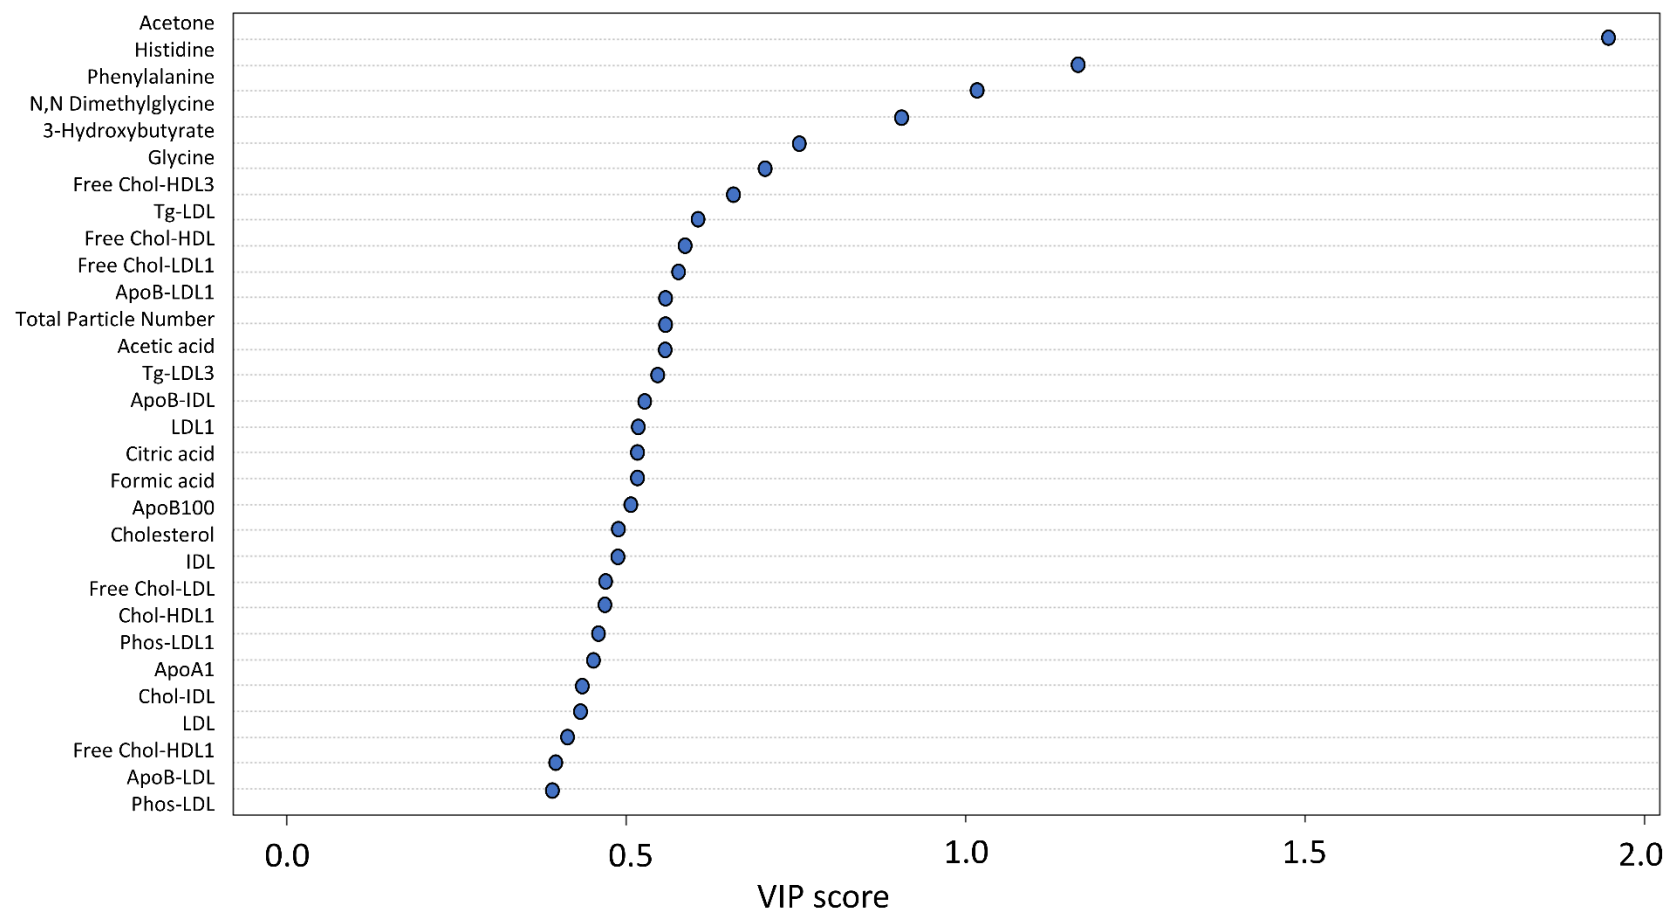

Supplement: MOESM1 [file 41531_2021_274_MOESM1_ESM.pdf]
